# Supplementary material
Source: Springer Nature journal article supplement (https://www.springermedizin.de/resource/supplementary/12911_2009_302_MOESM4_ESM.pdf/9525454)
Supplement: MOESM4 [file 9525454]

Suppose:  $ep_i$  = event-predicate  $i$  that does NOT appear inside the sub-ordinate clause  
 $ep_i'$  = event-predicate  $i$  that appear inside the sub-ordinate clause  
 $subj_i$  = subject of  $ep_i$  (including all phrases that modify  $subj_i$ )  
 $obj_i$  = object of  $ep_i$  (including all phrases that modify  $obj_i$ )  
 $mod_i$  =  $ep_i$ 's modifiers  
 $subor_i$  = sub-ordinate clause of  $ep_i$

#### Zone\_Boundary\_Generation

```
{
  Scan document for the first event-predicate  $ep_1$ 
  BoundaryExtension(document, 1,  $ep_1$ )
}
```

#### Boundary\_Extension

```
{
  Input: Text,  $i$ ,  $ep_i$ ,
  (1) Check for the  $ep_i$ 's property
      if  $i=1$  or  $ep_i$ 's attributes are not the same as  $ep_{i-1}$ 
      Initialize a new zone with the attributes of
       $ep_i$ 's attributes.
  (2) Extend the zone boundary from  $ep_i$  to the left and
      right to cover all  $subj_i$ ,  $obj_i$ ,  $mod_i$ , and  $subor_i$  that
      appear before the occurrence of  $ep_{i+1}$ .
  (3) If the boundary cover sub-ordinate clauses
      For each sub-ordinate clause,  $subor_i$ 
      Scan  $subor_i$  for the first appearance of  $ep_1'$ 
      BoundaryExtension( $subor_i$ ,  $ep_1'$ , 1)
  (4) Scan for the next event-predicate,  $ep_{i+1}$ , in Text
      (4.1) Update value of  $ep_i$  to  $ep_{i+1}$ 
      (4.2) Update value of  $i$  to  $i+1$ 
  (5) Repeat step (1)
}
```

#### Example

[The health officials in Pakistan have confirmed that

[the Crimean-Congo hemorrhagic fever has killed at least 5people , including a woman doctor , and infected around 45 people in the country's biggest city of Karachi.]

] [Dengue, commonly known as Congo fever, is spread through the bite of an infected Aedes Aegypti mosquito.]
